# Supplementary material for: Highly sensitive and selective electrochemical detection of caffeine, theophylline and guaiacol in green tea, green coffee, coffee, and tea extracts using a SnS2 nanoflake-modified electrode
Source: Royal Society of Chemistry journal article supplement (doi:10.1039/d3ma00561e), 2024-01-01
Supplement: d3ma00561e1.pdf [file d3ma00561e1.pdf]

**Highly sensitive and selective electrochemical detection of caffeine,  
theophylline and guaiacol in green tea, green coffee, coffee, and tea extracts  
using SnS<sub>2</sub> nanoflakes modified electrode**

Amisha Kushwaha<sup>#</sup>, Gajendar Singh<sup>#</sup>, Umesh Kumar Gaur<sup>&</sup> and Manu Sharma<sup>#\*</sup>

<sup>#</sup>Central University of Gujarat, Gandhinagar, Gujarat

<sup>&</sup>VP & RPTP Science College, Anand, Gujarat 382030, India

\*Corresponding Author: Manu Sharma

\*Email: [manu.sharma@cug.ac.in](mailto:manu.sharma@cug.ac.in)

**Supplementary information**

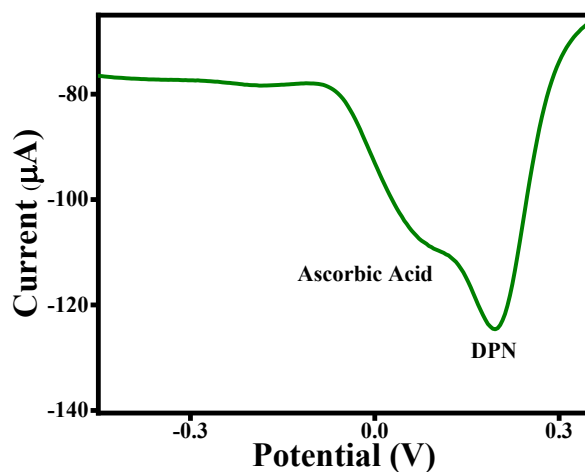

**Figure S1.** Ascorbic acid and dopamine (DPN) DPV graph

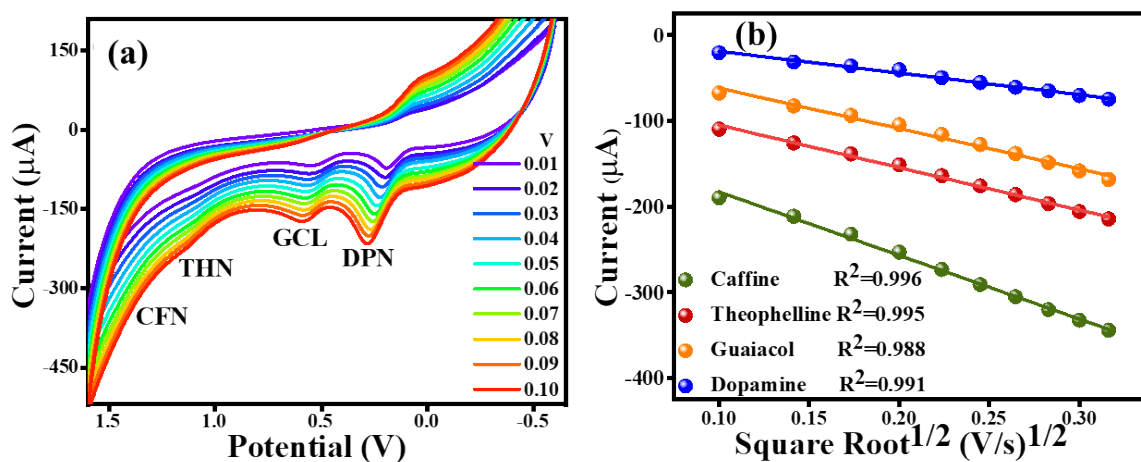

**Figure S2.** (a) A simultaneous CV response of CFN, THN, GCL and DPN oxidation (b) Related Square Root calibration graph of simultaneous CV response of CFN, THN, GCL and DPN

**Table S1:- EDS composition of TS (W), TS (E) and TS (I)**

| <b>TS(W) EDS composition</b> |       |       |       |
|------------------------------|-------|-------|-------|
| Element                      | S K   | Sn L  | Total |
| Weight %                     | 31.79 | 68.21 | 100   |
| Atomic %                     | 63.30 | 36.70 |       |
| <b>TS(E) EDS composition</b> |       |       |       |
| Element                      | S K   | Sn L  | Total |
| Weight %                     | 32.48 | 67.52 | 100   |
| Atomic %                     | 64.04 | 35.96 |       |
| <b>TS(I) EDS composition</b> |       |       |       |
| Element                      | S K   | Sn L  | Total |
| Weight %                     | 31.20 | 68.80 | 100   |
| Atomic %                     | 62.67 | 37.33 |       |

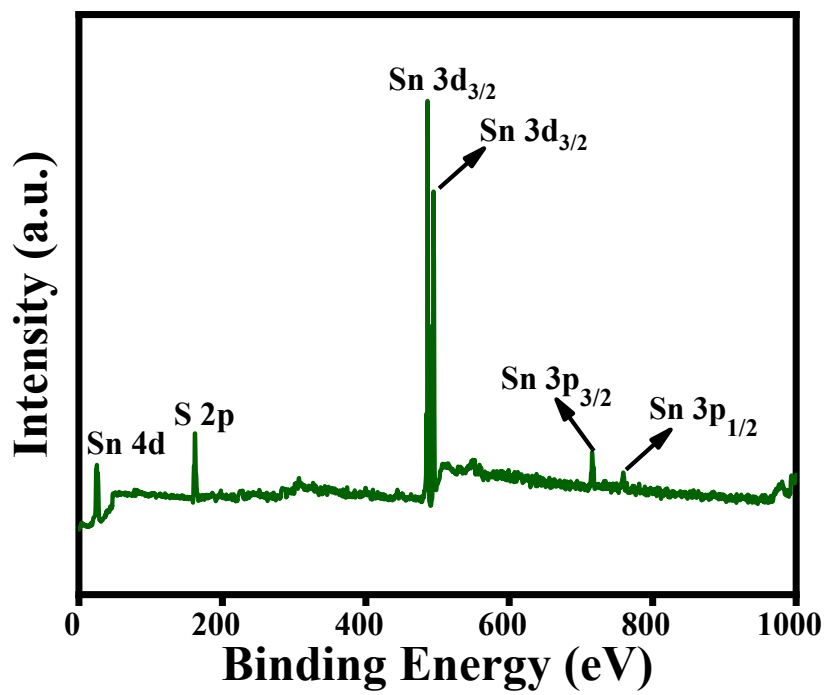

Figure. S3. Full Survey scan graph of SnS<sub>2</sub>

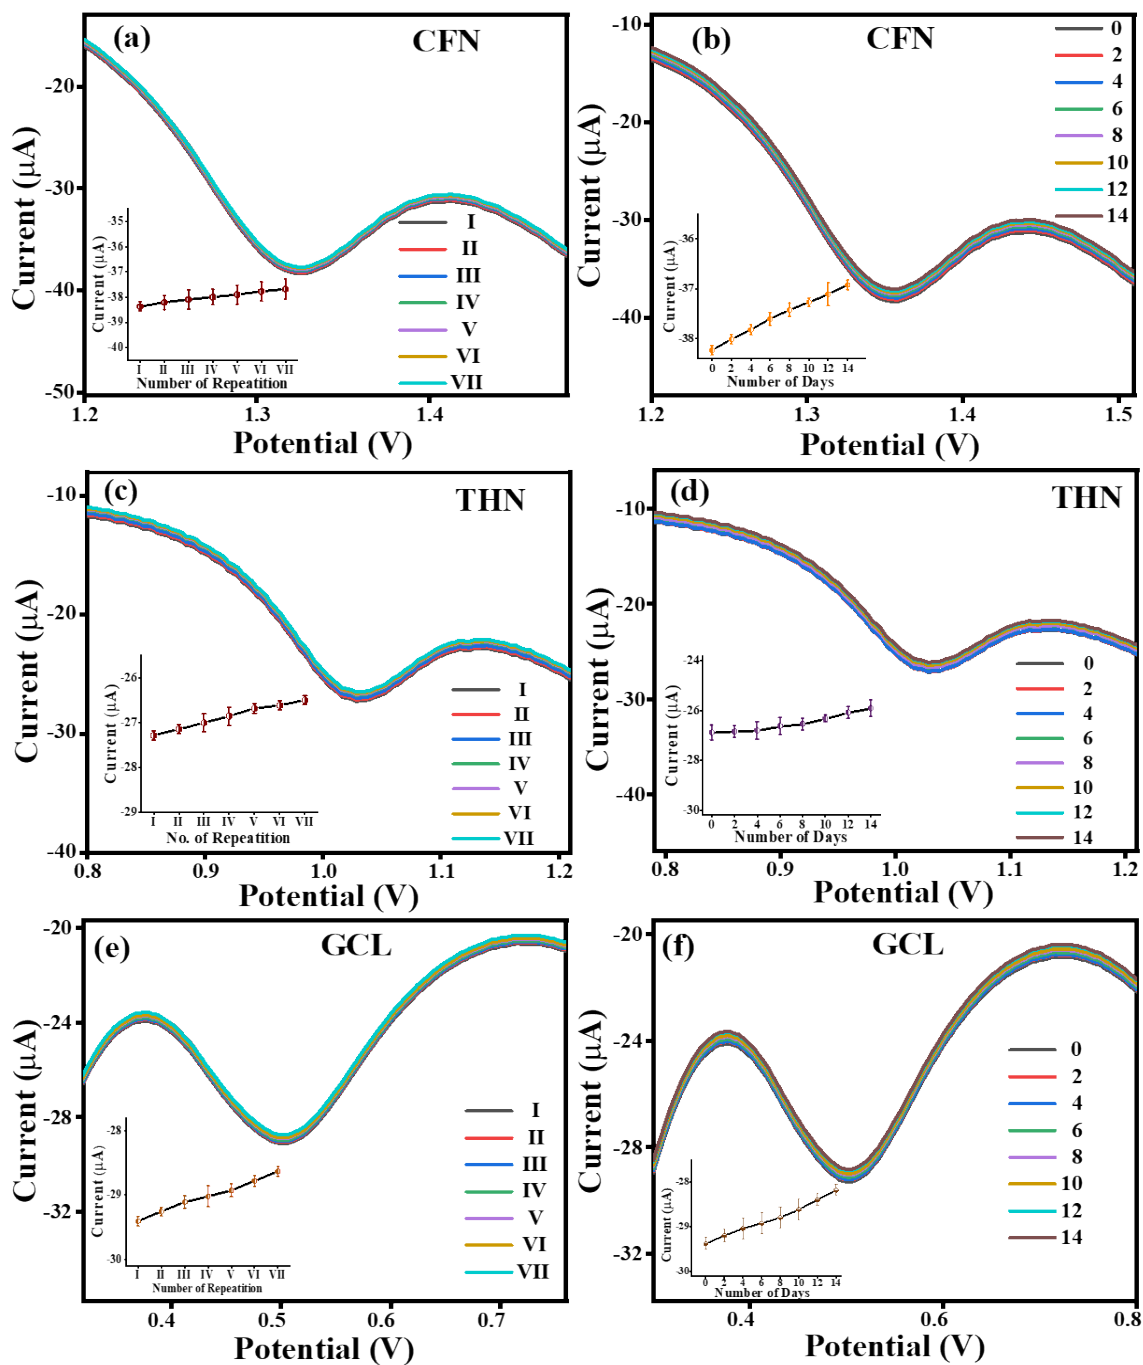

**Figure. S4** Differential Pulse Voltammetry (DPV) graph (a) for the seven times repeatability of CFN (b) for the stability of CFN up to 14 days (c) for the seven times repeatability of THN (d) for the stability of THF up to 14 days (e) for the seven times repeatability of GCL (f) for the stability of GCL up to 14 days.

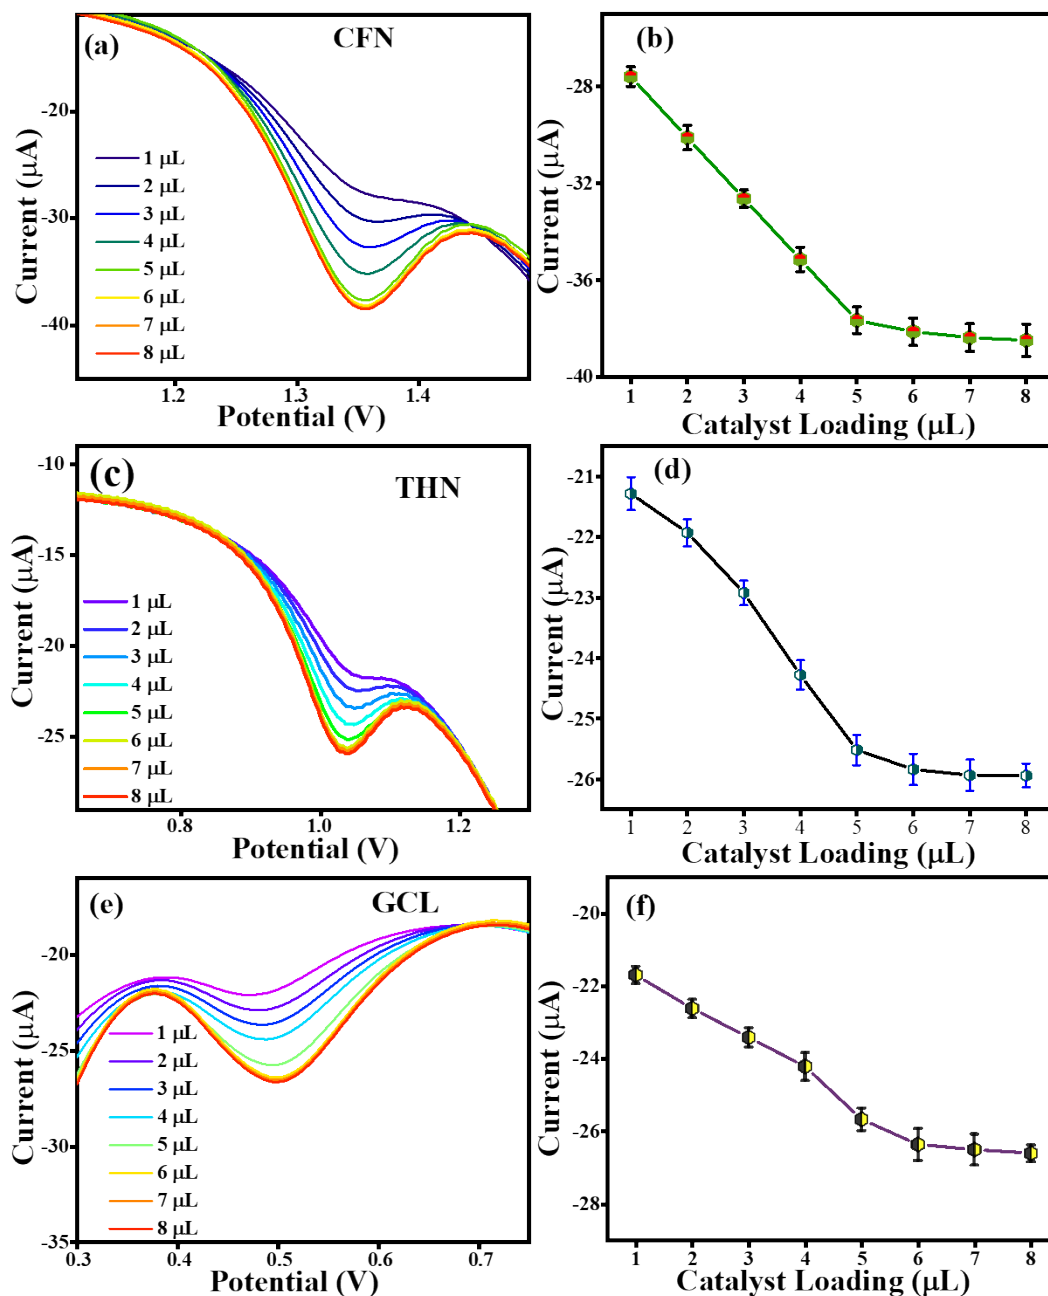

**Figure S5.** DPV graph (a) for CFN catalyst Loading graph (b) related linear calibration graph of CFN (c) for THN catalyst Loading graph (d) related linear calibration graph of THN (e) for GCL catalyst Loading graph (f) related linear calibration graph of GCL

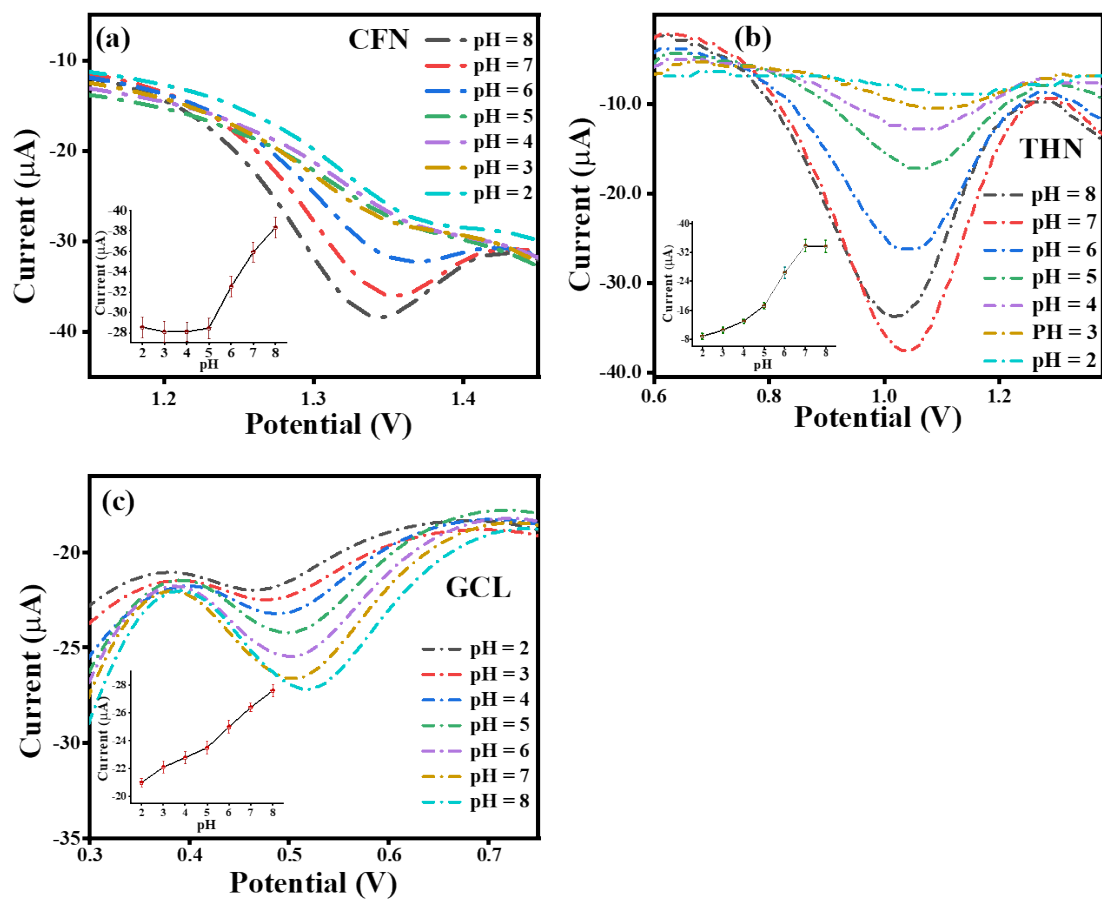

**Figure. S6** DPV graph (a) Varying buffer pH graph in CFN (b) Varying buffer pH graph in THN (c) Varying buffer pH graph in GCL
